# Supplementary material for: A high-density linkage map construction in guava (Psidium guajava L.) using genotyping by sequencing and identification of QTLs for leaf, peel, and pulp color in an intervarietal mapping population
Source: Front Plant Sci. 2024 Feb 27;15:1335715. doi: 10.3389/fpls.2024.1335715 (PMC10927721; doi:10.3389/fpls.2024.1335715)
Supplement: Supplementary file 11 [file Table_3.xlsx]

## Sheet: qLC1.1, SC1.1, qLL1.1
Gene ID	Function	Organism	score	E value
A0A8B8P305	Protein SCAI isoform X1	Rhodamnia argentea	1115	0
A0A1S3ZUV8	Uncharacterized protein LOC107790672	Nicotiana tabacum (Common tobacco)	143	2e-38
A0A8B8P110	tRNA (Cytosine(34)-C(5))-methyltransferase-like	Rhodamnia argentea	779	0
A0A8B8P094	Ras-related protein Rab11A	Rhodamnia argentea	436	1e-154
A0A8B8N9P8	Homeobox-leucine zipper protein MERISTEM L1-like	Rhodamnia argentea	178	2e-44
B9IM11	Response regulatory domain-containing protein	Populus trichocarpa	181	5e-48
A0A8B8P0D7	PGG domain-containing protein	Eucalyptus grandis (Flooded gum)	912
A0A059AKQ3	Borealin C-terminal domain-containing protein	Eucalyptus grandis (Flooded gum)	399	4e-137
A0A8B8PU44	Uncharacterized protein LOC115746270	Rhodamnia argentea	44.7	0.005
A0A8B8P198	ABC transporter G family member 11-like	Rhodamnia argentea	1254	0
A0A8B8MPC2	Uncharacterized protein LOC115725982	Rhodamnia argentea	97.1	5e-18
A0A7N2MBC5	Reverse transcriptase	Quercus lobata (Valley oak)	397	8e-124
A0A8B8MZ41	Uncharacterized protein LOC115728895	Rhodamnia argentea	211	2e-58
A0A059ALL8	ABC transporter domain-containing protein	Eucalyptus grandis (Flooded gum)	171	4e-44
A0A059ALL4	RRM domain-containing protein	Eucalyptus grandis (Flooded gum)	257	1e-85
A0A058ZRR3	Polyadenylate-binding protein 2	Eucalyptus grandis (Flooded gum)	191	2e-60
A0A059CIT0	Nucleoporin NSP1-like C-terminal domain-containing protein	Eucalyptus grandis (Flooded gum)	41.6	0.7
A0A8B8N9P8	Homeobox-leucine zipper protein MERISTEM L1-like	Rhodamnia argentea	191	9e-47
A0A6J5WMH8	Reverse transcriptase domain-containing protein	Prunus armeniaca (Apricot)	164	2e-44
A0A8B8PLT6	Nuclear pore complex protein NUP62-like	Rhodamnia argentea	46.6	0.016
A0A8B8N9P8	Homeobox-leucine zipper protein MERISTEM L1-like	Rhodamnia argentea	174	4e-47
A0A8B8NYF6	Uncharacterized protein LOC115738732	Rhodamnia argentea	69.3	4e-09

## Sheet: qPC2.1
Protein ID	Function	Organism	Score	E value
A0A059DGZ7	Elongin-A	Eucalyptus grandis (Flooded gum)	352	2e-114
A0A059DGT5	V-type proton ATPase subunit D	Eucalyptus grandis (Flooded gum)	480	6e-171
A0A3Q7F983	SWIM-type domain-containing protein	Solanum lycopersicum	39.3	1.1
A0A059DHH8	Citrate synthase	Eucalyptus grandis (Flooded gum)	935	0
A0A2I0K2T6	Uncharacterized protein	Punica granatum (Pomegranate)	47	0.008
A0A059DFZ9	Leucine-rich repeat-containing N-terminal plant-type domain-containing protein	Eucalyptus grandis (Flooded gum)	742	0
A0A059AXD1	AP2/ERF domain-containing protein	Eucalyptus grandis (Flooded gum)	110	4e-23
A0A059DGU0	Aminotransferase-like plant mobile domain-containing protein	Eucalyptus grandis (Flooded gum)	1298	0
A0A1R3KVY3	THUMP domain-containing protein	Corchorus capsularis (Jute)	39.7	1.5
A0A8B8N3Q1	Serine/threonine-protein phosphatase 5	Rhodamnia argentea	1069	0
A0A8J5Y395	Reverse transcriptase Ty1/copia-type domain-containing protein	Gossypium anomalum	132	1e-33
A0A059DGJ4	UBZ4-type domain-containing protein	Eucalyptus grandis (Flooded gum)	2027	0
A0A8B8N8W5	HVA22-like protein	Rhodamnia argentea	317	1e-109
A0A059DGU4	Hexosyltransferase	Eucalyptus grandis (Flooded gum)	793	0
A0A059DH14	Protodermal factor 1	Eucalyptus grandis (Flooded gum)	234	2e-68
A0A059C3A2	Cytochrome P450	Eucalyptus grandis (Flooded gum)	625	0
A0A059DFL9	Uncharacterized protein	Eucalyptus grandis (Flooded gum)	56.6	2e-07
A0A7J7HBR5	F-box domain-containing protein	Camellia sinensis (Tea)	45.4	0.001
A0A0N7KMN2	Os06g0696450 protein	Oryza sativa subsp. japonica (Rice)	59.7	1e-08
A0A059DGU8	Xyloglucan endotransglucosylase/hydrolase	Eucalyptus grandis (Flooded gum)	540	0
A0A804HY25	Uncharacterized protein	Musa acuminata subsp. malaccensis (Wild banana) (Musa malaccensis)	37.7	1.1
A0A059DH17	Xyloglucan endotransglucosylase/hydrolase	Eucalyptus grandis (Flooded gum)	394	9e-135
A0A7N2LY43	Glycine-rich cell wall structural protein	Quercus lobata (Valley oak)	152	4e-40
A0A059DH17	Xyloglucan endotransglucosylase/hydrolase	Eucalyptus grandis (Flooded gum)	530	0
A0A444FPJ5	Histone chaperone domain-containing protein	Ensete ventricosum (Abyssinian banana) (Musa ensete)	42.7	0.011
A0A8B8N6N3	Peroxisomal and mitochondrial division factor 1-like	Rhodamnia argentea	364	2e-118
A0A059DGK9	Protein kinase domain-containing protein	Eucalyptus grandis (Flooded gum)	1158	0

## Sheet: qLL10.1
Gene ID	Function	Organism	score	E value
A0A8B8N9P8	Homeobox-leucine zipper protein MERISTEM L1-like	Rhodamnia argentea	184	2e-50
A0A835DEL8	Response regulatory domain-containing protein	Populus trichocarpa	181	5e-48
A0A8T0CSD6	Nucleoporin NSP1-like C-terminal domain-containing protein	Eucalyptus grandis (Flooded gum)	50.1	0.001
A0A8B8Q1X7	Uncharacterized protein	Eucalyptus grandis (Flooded gum)	332	2e-110
A0A059CBA2	choline-phosphate cytidylyltransferase	Eucalyptus grandis (Flooded gum)	58.5	2e-07
A0A8B8PWR6	Probable serine/threonine-protein kinase PBL15 isoform X5	Rhodamnia argentea	124	1e-27
A0A059AZ70	TIR domain-containing protein	Eucalyptus grandis (Flooded gum)	333	3e-113
A0A059D3I6	Aminotransferase-like plant mobile domain-containing protein	Eucalyptus grandis (Flooded gum)	332	4e-107
A0A8B8N8E6	Uncharacterized protein LOC115732183	Rhodamnia argentea	1882	0
A0A6D2KXQ9	TIR domain-containing protein	Microthlaspi erraticum	40.8	0.34
A0A059AAF9	TIR domain-containing protein	Eucalyptus grandis (Flooded gum)	286	1e-09
A0A8B8Q092	Disease resistance protein RLM3-like	Rhodamnia argentea	45.1	0.01
A0A8B8PZW0	TMV resistance protein N-like	Rhodamnia argentea	263	3e-84
A0A914Z6F5	EH domain-binding protein 1	Panagrolaimus superbus	44.7	0.011
A0A8B8Q0A8	RING-type E3 ubiquitin transferase	Rhodamnia argentea	377	2e-130
A0A059A9E0	BZIP domain-containing protein	Eucalyptus grandis (Flooded gum)	594	0
A0A8T0EZK9	Dynamin-binding protein	Argiope bruennichi (Wasp spider) (Aranea bruennichi)	41.6	0.29
A0A8B8Q1H6	Expansin	Rhodamnia argentea	516	0
A0A059A9M6	Macro domain-containing protein	Eucalyptus grandis (Flooded gum)	440	2e-155
A0A059A958	Reticulon-like protein	Eucalyptus grandis (Flooded gum)	266	3e-84
A0A7W4PTZ5	GNAT family N-acetyltransferase	Gluconacetobacter takamatsuzukensis	37.7	0.77
A0A059AAG9	Superoxide dismutase	Eucalyptus grandis (Flooded gum)	599	0
A0A059A8C7	PAP-associated domain-containing protein	Eucalyptus grandis (Flooded gum)	1165	0
A0A8B8Q050	Alpha-galactosidase	Rhodamnia argentea	236	7e-75
A0A8B8Q051	Alpha-galactosidase	Rhodamnia argentea	595	0
A0A2K3KED0	Transmembrane protein	Trifolium pratense (Red clover)	62	0.6
A0A8B8Q241	Potassium transporter	Rhodamnia argentea	1555	0
A0A8B8Q0D3	Mini-chromosome maintenance complex-binding protein	Rhodamnia argentea	1309	0
A0A059A9H4	Tyrosine specific protein phosphatases domain-containing protein	Eucalyptus grandis (Flooded gum)	518	0
A0A1I2HN23	NPCBM-associated, NEW3 domain of alpha-galactosidase	Actinacidiphila alni	45.8	0.021
A0A830CXR6	Adenine/guanine permease azg1	Phtheirospermum japonicum	73.6	3e-10
A0A8B8Q082	YLP motif-containing protein 1-like	Rhodamnia argentea	414	4e-145
A0A1R3GAN8	Reverse transcriptase	Corchorus capsularis (Jute)	40	0.12
A0A6P6WJM2	LOB domain-containing protein 15-like isoform X2	Coffea arabica (Arabian coffee)	179	6e-54
A0A8B8Q0C8	Peroxidase	Rhodamnia argentea	611	0
A0A8B8Q097	Uncharacterized protein LOC115748182 isoform X1	Rhodamnia argentea	231	6e-74
A0A8B8Q1C7	BTB/POZ domain-containing protein At3g56230-like isoform X1	Rhodamnia argentea	492	5e-175

## Sheet: qPEL1.1,qPEA1.1
Gene ID	Name	Organism	Score	E value
A0A392NC99	Gag-pol polyprotein	Trifolium medium	181	1e-49
A0A8B8P315	Ubiquitin carboxyl-terminal hydrolase 3-like	Rhodamnia argentea	652	0
A0A151SIM4	Retrovirus-related Pol polyprotein from transposon TNT 1-94	Cajanus cajan (Pigeon pea)	381	2e-121
A0A1Q3AMB1	Rve domain-containing protein/gag_pre-integrs domain-containing protein/UBN2_2 domain-containing protein	Cephalotus follicularis	619	0
A0A2G2YGH0	Reverse transcriptase Ty1/copia-type domain-containing protein	Capsicum annuum (Capsicum pepper)	75.9	5e-13
A0A8B8PJQ7	Cyclin-dependent kinase C-1-lik	Rhodamnia argentea	952	0
A0A059ALF8	Mitochondrial adenine nucleotide transporter BTL3	Eucalyptus grandis (Flooded gum)	729	0
A0A445LRK1	Retrovirus-related Pol polyprotein from transposon TNT 1-94, 2.7.7.7, 6.3.2.17	Glycine soja (Wild soybean)	493	9e-147
A0A8T0CNS4	CCHC-type domain-containing protein	Corymbia citriodora subsp. Variegata	115	6e-30
A0A1Q3B1C4	RVT_2 domain-containing protein	Cephalotus follicularis (Albany pitcher plant)	132	8e-36
A0A978W1E6	Homeobox-leucine zipper protein MERISTEM L1-like	Ziziphus jujuba var. Spinosa	85.1	2e-16
A0A059AM84	RecA family profile 1 domain-containing protein	Eucalyptus grandis (Flooded gum)	620	0
A0A061DVC7	Gag-pol polyprotein, putative	Theobroma cacao (Cacao) (Cocoa)	268	7e-78
A0A1U8J6Y5	RNA-directed DNA polymerase, 2.7.7.49	Gossypium hirsutum	778	0
F6HEV8	Reticulon-like protein	Vitis vinifera (Grape)	79.7	2e-15
A0A059D5Y4	Fiber protein Fb34	Eucalyptus grandis (Flooded gum)	157	1e-45
A0A8B8N9P8	Homeobox-leucine zipper protein MERISTEM L1-like	Rhodamnia argentea	181	7e-50
A0A5N5J759	Response regulatory domain-containing protein	Salix brachista	183	3e-50
A0A8B8PLT6	Nuclear pore complex protein NUP62-like	Rhodamnia argentea	45.4	0.027
A0A835D908	Retrotransposon gag domain-containing protein	Tetracentron sinense

## Sheet: qPEL2.1
Gene ID	Name	Organism	Score	E value
A0A8B8PLT6	Nuclear pore complex protein NUP62-like	Rhodamnia argentea	51.2	0.0005
A0A4S4DCS1	Response regulatory domain-containing protein	Camellia sinensis var. Sinensis	189	8e-48
A0A059DGQ8	4-hydroxyphenylpyruvate dioxygenase	Eucalyptus grandis (Flooded gum)	848	0
A0A0A0LGY6	F-BAR domain-containing protein	Cucumis sativus (Cucumber)	41.6	0.032
A0A059DH15	4-hydroxyphenylpyruvate dioxygenase	Eucalyptus grandis (Flooded gum)	439	5e-150
A0A059DH75	tRNA (guanine-N(7)-)-methyltransferase	Eucalyptus grandis (Flooded gum)	89	1e-18
A0A059DH15	4-hydroxyphenylpyruvate dioxygenase	Eucalyptus grandis (Flooded gum)	796	0
A0A059DHP3	Anaphase-promoting complex subunit 5	Eucalyptus grandis (Flooded gum)	1188	0
A0A059DG74	PH domain-containing protein	Eucalyptus grandis (Flooded gum)	910	0
A0A059DH21	NAC domain-containing protein	Eucalyptus grandis (Flooded gum)	540	0
A0A4S4DCS1	Response regulatory domain-containing protein	Camellia sinensis var. Sinensis	183	8e-47
A0A8B8PLT6	Nuclear pore complex protein NUP62-like	Rhodamnia argentea	50.1	0.001
A0A8B8NAB0	Protein JASON-like isoform X2	Rhodamnia argentea	891	0
A0A8B8NXV6	Calvin cycle protein CP12-3, chloroplastic	Rhodamnia argentea	76.3	1e-14
A0A059D069	HTH TFE/IIEalpha-type domain-containing protein	Eucalyptus grandis (Flooded gum)	242	4e-75
A0A059DG79	Phytoene synthase	Eucalyptus grandis (Flooded gum)	463	2e-157
A0A151THM1	Retrovirus-related Pol polyprotein from transposon TNT 1-94	Cajanus cajan (Pigeon pea)	165	1e-41
A0A059DH26	HTH myb-type domain-containing protein	Eucalyptus grandis (Flooded gum)	339	8e-117
A0A059DHQ2	TLC domain-containing protein	Eucalyptus grandis (Flooded gum)	289	4e-94
A0A059DH89	BTB domain-containing protein	Eucalyptus grandis (Flooded gum)	722	0
A0A059DHQ8	Terpene cyclase/mutase family member, 5.4.99	Eucalyptus grandis (Flooded gum)	1468	0
A0A059DHQ8	Terpene cyclase/mutase family member, 5.4.99	Eucalyptus grandis (Flooded gum)	1521	0

## Sheet: qPEB2.1
Gene ID	Function	Organism	Score	E value
A0A8B8N9P8	Homeobox-leucine zipper protein MERISTEM L1-like	Rhodamnia argentea	185	8e-46
A0A2I0JGQ0	Uncharacterized protein	Punica granatum (Pomegranate)	63.9	4e-08
A0A8B8PLT6	Nuclear pore complex protein NUP62-like	Rhodamnia argentea	51.6	0.0004
A0A8B8N9P8	Homeobox-leucine zipper protein MERISTEM L1-like	Rhodamnia argentea	184	9e-45
A0A8B8N2R7	RNA helicase	Rhodamnia argentea	2425	0
A0A8B8N2G0	WD repeat-containing protein 26 homolog	Rhodamnia argentea	1095	0
A0A059DH44	PsbP C-terminal domain-containing protein	Eucalyptus grandis (Flooded gum)	484	2e-172
A0A8B8N0H7	Reticulon-like protein	Rhodamnia argentea	376	1e-127
A0A540L9D8	BHLH domain-containing protein	Malus baccata (Siberian crab apple)	1080	0
A0A2I0L9D6	Uncharacterized protein	Punica granatum (Pomegranate)	34.7	9.5
A0A8J5Y1G3	NB-ARC domain-containing protein	Gossypium anomalum	42.4	0.7
A0A8B8N653	Polyamine oxidase 2 isoform X1	Rhodamnia argentea	961	0
A0A8B8N7S8	Protein NPG1 isoform X1	Rhodamnia argentea	1303	0
A0A8B8NE66	Protein DETOXIFICATION	Rhodamnia argentea	516	3e-170
A0A445HPU2	Retrovirus-related Pol polyprotein from transposon TNT 1-94	Glycine soja (Wild soybean)	829	0
A0A8B8NE66	Protein DETOXIFICATION	Rhodamnia argentea	839	0
A0A059ARH8	CCHC-type domain-containing protein	Eucalyptus grandis (Flooded gum)	68.2	1e-09
A0A8B8N7M7	Protein DETOXIFICATION	Rhodamnia argentea	967	0
A0A8B8N9P8	Homeobox-leucine zipper protein MERISTEM L1-like	Rhodamnia argentea	183	2e-49

## Sheet: qPEB9.1
Gene ID	Name	Organism	Score	E value
A0A151QXV8	Retrotransposon gag domain-containing protein	Cajanus cajan (Pigeon pea)	145	1e-35
A0A8B8QZP8	protein-serine/threonine phosphatase, 3.1.3.16	Rhodamnia argentea	167	2e-40
A0A0S3RVQ5	CCHC-type domain-containing protein	Vigna angularis var. Angularis	355	7e-119
A0A059DDA7	Glycosyltransferase	Eucalyptus grandis (Flooded gum)	202	1e-55
A0A6A2YHX5	Retrovirus-related Pol polyprotein from transposon TNT 1-94	Hibiscus syriacus (Rose of Sharon)	1456	0
A0A8B8QCL6	Zinc transporter 8-like	Rhodamnia argentea	94	4e-19
A0A059DDL8	Glycosyltransferase	Eucalyptus grandis (Flooded gum)	105	3e-22
A0A059DDA7	Glycosyltransferase	Eucalyptus grandis (Flooded gum)	731	0
A0A8B8QCL6	Zinc transporter 8-like	Rhodamnia argentea	473	3e-164
A0A8J5Z5E5	Integrase catalytic domain-containing protein	Gossypium anomalum	724	0
A0A059DE89	S5 DRBM domain-containing protein	Eucalyptus grandis (Flooded gum)	903	0
A0A059DDA0	Cytochrome P450	Eucalyptus grandis (Flooded gum)	1023	0
A0A059DCQ8	Protein FAR1-RELATED SEQUENCE	Eucalyptus grandis (Flooded gum)	1369	0
A0A059DDR4	Nucleolar protein 10	Eucalyptus grandis (Flooded gum)	54.7	1e-07
A0A059DDJ6	Protein FAR1-RELATED SEQUENCE	Eucalyptus grandis (Flooded gum)	1588	0
A0A059DD94	PORR domain-containing protein	Eucalyptus grandis (Flooded gum)	842	0
A0A059DDQ9	S-acyltransferase, 2.3.1.225, Palmitoyltransferase	Eucalyptus grandis (Flooded gum)	1027	0
A0A218XA33	Myosin-9	Punica granatum (Pomegranate)	1546	0
A0A8T0CK29	F-box domain-containing protein	Corymbia citriodora subsp. Variegata	534	0
A0A218X5J5	TBC1 domain family member 2B	Punica granatum (Pomegranate)	50.4	0.002
A0A059CHX3	C2H2-type domain-containing protein	Eucalyptus grandis (Flooded gum)	70.1	1e-11
A0A059DE66	Glycosyltransferase, 2.4.1.-	Eucalyptus grandis (Flooded gum)	779	0

## Sheet: qPEB7.1
Gene ID	Name	Organism	Score	E value
A0A8B8MVT4	Lysine histidine transporter-like 6	Rhodamnia argentea	206	4e-56
A0A7N2KWL9	RNA-directed DNA polymerase, 2.7.7.49	Quercus lobata (Valley oak)	1211	0
A0A8B8MLF8	Transcriptional elongation regulator MINIYO LOC115726096	Rhodamnia argentea	2801	0
A0A251VT74	Phytochrome	Helianthus annuus (Common sunflower)	38.3	1.1
A0A2I0JT04	Reverse transcriptase Ty1/copia-type domain-containing protein	Punica granatum (Pomegranate)	271	3e-90
A0A2R6RYG5	Endonuclease	Actinidia chinensis var. Chinensis	938	0
A0A058ZVA9	MD-2-related lipid-recognition domain-containing protein	Eucalyptus grandis (Flooded gum)	43.1	0.002
A0A8B8MM49	Acetylserotonin O-methyltransferase-like	Rhodamnia argentea	481	2e-162
A0A059BEP9	Mechanosensitive ion channel protein	Eucalyptus grandis (Flooded gum)	1283	0
A0A7J7HQD6	Response regulatory domain-containing protein	Camellia sinensis (Tea)	187	4e-47
A0A8B8PLT6	Nuclear pore complex protein NUP62-like	Rhodamnia argentea	46.6	0.016
A0A059BDF4	Pentacotripeptide-repeat region of PRORP domain-containing protein	Eucalyptus grandis (Flooded gum)	1040	0
A0A8B8MLG7	DDB1- and CUL4-associated factor 8-like	Rhodamnia argentea	878	0
A0A8B8MQQ2	Pentatricopeptide repeat-containing protein At4g35130, chloroplastic-like	Rhodamnia argentea	1461	0
A0A8B8MM65	Serine/threonine protein phosphatase 2A 57 kDa regulatory subunit B' beta isoform-like	Rhodamnia argentea	842	0
A0A059BE23	J domain-containing protein	Eucalyptus grandis (Flooded gum)	530	0
A0A059BE20	DUF616 domain-containing protein	Eucalyptus grandis (Flooded gum)	849	0
A0A059BEN1	Vacuolar proton pump subunit B, V-ATPase subunit B	Eucalyptus grandis (Flooded gum)	941	0

## Sheet: qPUL2.1
ID	Gene_Name
A0A059BUD3	Splicing factor YJU2	Eucalyptus grandis (Flooded gum)	291	2e-92
A0A1Q3CK31	Zf-RVT domain-containing protein	Cephalotus follicularis (Albany pitcher plant)	132	1e-32
A0A978VKV0	1,3-beta-glucan synthase	Ziziphus jujuba var. Spinosa	2291	0
A0A059DGP5	THH1/TOM1/TOM3 domain-containing protein	Eucalyptus grandis (Flooded gum)	404	8e-133
A0A2P6RMC5	Putative RNA-directed DNA polymerase	Rosa chinensis (China rose)	736	0
A0A139GX87	Myb-like domain-containing protein	Pseudocercospora eumusae	49.7	0.002
A0A8B8N7C4	Conserved oligomeric Golgi complex subunit 5	Rhodamnia argentea	972	0
A0A8B8N4I4	GDSL esterase/lipase At4g10955-like	Rhodamnia argentea	533	0
A0A8B8N4I4	GDSL esterase/lipase At4g10955-like	Rhodamnia argentea	533	0
A0A059DH04	Cytochrome b561 domain-containing protein	Eucalyptus grandis (Flooded gum)	379	2e-131
A0A8B8N832	Protein VACUOLELESS1	Rhodamnia argentea	1593	0
A0A059DH70	Large ribosomal subunit protein eL20 domain-containing protein	Eucalyptus grandis (Flooded gum)	369	1e-127
A0A059DG62	Peptidase A1 domain-containing protein	Eucalyptus grandis (Flooded gum)	795	0
A0A059DH09	Metallo-beta-lactamase domain-containing protein	Eucalyptus grandis (Flooded gum)	305	8e-102
A0A0P0VIF2	Os02g0332800 protein	Oryza sativa subsp. japonica (Rice)	45.1	0.044
A0A8B8N4Z7	tRNA (guanine-N(7)-)-methyltransferase	Eucalyptus grandis (Flooded gum)	499	3e-178
A0A8B8N4Y6	4-hydroxyphenylpyruvate dioxygenase	Eucalyptus grandis (Flooded gum)	730	0
A0A059CIT0	Nucleoporin NSP1-like C-terminal domain-containing protein	Eucalyptus grandis (Flooded gum)	42.7	0.29
A0A4S4DCS1	Response regulatory domain-containing protein	Camellia sinensis var. Sinensis	189	8e-48
A0A059DGQ8	4-hydroxyphenylpyruvate dioxygenase	Eucalyptus grandis (Flooded gum)	848	0
A0A0A0LGY6	F-BAR domain-containing protein	Cucumis sativus (Cucumber)	41.6	0.032
A0A059DH15	4-hydroxyphenylpyruvate dioxygenase	Eucalyptus grandis (Flooded gum)	439	5e-150
A0A059DH75	tRNA (guanine-N(7)-)-methyltransferase	Eucalyptus grandis (Flooded gum)	89	1e-18
A0A059DH15	4-hydroxyphenylpyruvate dioxygenase	Eucalyptus grandis (Flooded gum)	796	0
A0A059DHP3	Anaphase-promoting complex subunit 5	Eucalyptus grandis (Flooded gum)	1575	0
A0A059DG74	PH domain-containing protein	Eucalyptus grandis (Flooded gum)	910	0
A0A059DH21	NAC domain-containing protein	Eucalyptus grandis (Flooded gum)	540	0

## Sheet: qPUA2.1
chr10:29116980
Gene ID	Name	Organism	Score	E value
A0A8B8PLT6	Nuclear pore complex protein NUP62-like	Rhodamnia argentea	53.9	6e-05
A0A4S4DCS1	Response regulatory domain-containing protein	Camellia sinensis var. Sinensis	183	2e-48
A0A6A2YHX5	Retrovirus-related Pol polyprotein from transposon TNT 1-94	Hibiscus syriacus (Rose of Sharon)	1393	0
A0A8B8NEW3	Dehydrogenase/reductase SDR family member FEY-like	Rhodamnia argentea	538	0
A0A8B8NDM8	Auxin response factor	Rhodamnia argentea	1613	0
A0A5N6L559	Apyrase	Carpinus fangian	941	0
A0A059DHE3	Ricin B lectin domain-containing protein	Eucalyptus grandis (Flooded gum)	541	0
A0A2I4C5Z3	Piezo-type mechanosensitive ion channel component 2 isoform X5	Austrofundulus limnaeus	39.3	0.56
A0A059DHW7	NAC domain-containing protein	Eucalyptus grandis (Flooded gum)	758	0
A0A059DGY1	RRM domain-containing protein	Eucalyptus grandis (Flooded gum)	815	0
A0A6A3AAI1	Putative Aspartate/glutamate/uridylate kinase family protein	Hibiscus syriacus (Rose of Sharon)	35.8	2.5
A0A5B6VVV3	Transmembrane protein	Gossypium australe	105	6e-24
A0A059DGG5	HTH myb-type domain-containing protein	Eucalyptus grandis (Flooded gum)	336	4e-109
G7JE74	Transmembrane protein, putative	Medicago truncatula	38.1	0.45
A0A8B8N365	CCR4-NOT transcription complex subunit 3 isoform X4	Rhodamnia argentea	1340	0
A0A7J9H1L8	glucan endo-1,3-beta-D-glucosidase	Gossypium harknessii	290	1e-91

[truncated: 2 more sheets: qPUB10.1, qPUB2.1]
